# Supplementary material for: Physical, chemical and mineralogical attributes of a representative group of soilsfrom the Eastern Amazon, Brazil
Source: Copernicus journal article supplement (doi:10.5194/soil-2018-3), 2018-02-19
Supplement: Supplementary file 1 [file soil-2018-3-supplement.pdf]

1 Supplementary

2 **Table S1**

3 Samples collected in the classes of representative soils from the state of Pará

| BSCS <sup>1</sup> | FAO/WRB (FAO, 2006) <sup>2</sup> | Collection areas | Collected samples | Total % |
|-------------------|----------------------------------|------------------|-------------------|---------|
| Latosols          | Ferralsols                       | 48               | 288               | 54.5    |
| Argisols          | Acrisols                         | 23               | 138               | 26.1    |
| Nitisols          | Nitisols                         | 3                | 18                | 3.4     |
| Plintosols        | Plinthosols                      | 3                | 18                | 3.4     |
| Neosols           | Arenosols                        | 3                | 18                | 3.4     |
| Gleisols          | Gleysols                         | 5                | 30                | 5.6     |
| Cambisols         | Cambisols                        | 3                | 18                | 3.4     |
| Total             | -                                | 88               | 528               | 100     |

4 <sup>1</sup>Ranked 1st in taxonomic level - Orders, according to the Brazilian Soil Classification System - BSCS (Embrapa, 2013);

5 <sup>2</sup>Ranked 1st in taxonomic level - Orders, according FAO. World reference base for soil resources (FAO, 2006).

6

7

8

9

10

11

12

13

14

15

16

17

18

19

20

21

22 **Table S2.**

23 Physical and chemical properties of the soils in the subsurface layer in the state of Pará.

| Statistic <sup>a</sup> | pH<br>H <sub>2</sub> O | OC <sup>b</sup><br>g kg <sup>-1</sup> | P<br>mg kg <sup>-1</sup> | K<br>mg kg <sup>-1</sup> | Ca<br>.....mmolc kg <sup>-1</sup> ..... | Mg<br>.....mmolc kg <sup>-1</sup> ..... | Al<br>.....mmolc kg <sup>-1</sup> ..... | H+Al<br>.....mmolc kg <sup>-1</sup> ..... | CEC <sup>c</sup> | v <sup>d</sup><br>.....%..... | m <sup>e</sup> | Sand<br>.....g kg <sup>-1</sup> ..... | Clay<br>.....g kg <sup>-1</sup> ..... | Silt |
|------------------------|------------------------|---------------------------------------|--------------------------|--------------------------|-----------------------------------------|-----------------------------------------|-----------------------------------------|-------------------------------------------|------------------|-------------------------------|----------------|---------------------------------------|---------------------------------------|------|
| Latosols               |                        |                                       |                          |                          |                                         |                                         |                                         |                                           |                  |                               |                |                                       |                                       |      |
| Mean                   | 4.7                    | 6                                     | 2                        | 0.02                     | 10.9                                    | 2.2                                     | 7.5                                     | 25.7                                      | 20.62            | 34                            | 36             | 474                                   | 410                                   | 116  |
| Minim                  | 3.8                    | 3                                     | 0.01                     | 0.01                     | 0.1                                     | 0.2                                     | 0.3                                     | 9.8                                       | 3.0              | 2                             | 1              | 280                                   | 106                                   | 2    |
| Maxim                  | 6.0                    | 9                                     | 28                       | 1.2                      | 48.9                                    | 15.1                                    | 23.1                                    | 68.0                                      | 60.3             | 85                            | 90             | 871                                   | 931                                   | 716  |
| CV <sup>f</sup> (%)    | 13                     | 23                                    | 189                      | 158                      | 149                                     | 160                                     | 81                                      | 47                                        | 96               | 138                           | 52             | 48                                    | 56                                    | 134  |
| C. Fert. <sup>g</sup>  | L                      | L                                     | L                        | VL                       | L                                       | L                                       | M                                       | L                                         | L                | VL                            | M              | -                                     | -                                     | -    |
| Argisols               |                        |                                       |                          |                          |                                         |                                         |                                         |                                           |                  |                               |                |                                       |                                       |      |
| Mean                   | 4.4                    | 5                                     | 1                        | 0.1                      | 1.3                                     | 0.8                                     | 11.0                                    | 26.0                                      | 13.2             | 8                             | 83             | 565                                   | 368                                   | 67   |
| Minim                  | 4.0                    | 4                                     | 0.01                     | 0.001                    | 0.2                                     | 0.1                                     | 5.6                                     | 14.8                                      | 5.9              | 1                             | 75             | 331                                   | 176                                   | 21   |
| Maxim                  | 5.1                    | 6                                     | 7                        | 0.3                      | 2.2                                     | 2.2                                     | 24.7                                    | 43.2                                      | 27.3             | 19                            | 89             | 776                                   | 610                                   | 149  |
| CV (%)                 | 8                      | 14                                    | 19                       | 111                      | 55                                      | 80                                      | 52                                      | 32                                        | 51               | 80                            | 9              | 26                                    | 38                                    | 59   |
| C. Fert.               | VL                     | L                                     | VL                       | VL                       | VL                                      | VL                                      | H                                       | M                                         | L                | VL                            | VH             | -                                     | -                                     | -    |
| Nitossols              |                        |                                       |                          |                          |                                         |                                         |                                         |                                           |                  |                               |                |                                       |                                       |      |
| Mean                   | 4.6                    | 6                                     | 2                        | 0.2                      | 21.5                                    | 8.8                                     | 3.2                                     | 31.3                                      | 33.7             | 49                            | 10             | 119                                   | 800                                   | 81   |
| Minim                  | 4.2                    | 9                                     | 1                        | 0.01                     | 1.7                                     | 1.4                                     | 0.9                                     | 28.8                                      | 6.4              | 4                             | 3              | 71                                    | 737                                   | 66   |
| Maxim                  | 4.9                    | 11                                    | 2                        | 0.2                      | 38.5                                    | 16.1                                    | 6.0                                     | 33.8                                      | 46.0             | 60                            | 78             | 167                                   | 862                                   | 96   |
| CV (%)                 | 10                     | 13                                    | 37                       | 12                       | 185                                     | 119                                     | 83                                      | 11                                        | 107              | 124                           | 137            | 57                                    | 11                                    | 26   |
| C. Fert.               | L                      | L                                     | VL                       | VL                       | M                                       | M                                       | L                                       | M                                         | M                | L                             | VL             | -                                     | -                                     | -    |
| Plintossols            |                        |                                       |                          |                          |                                         |                                         |                                         |                                           |                  |                               |                |                                       |                                       |      |
| Mean                   | 4.4                    | 6                                     | 1                        | 0.01                     | 0.3                                     | 0.3                                     | 11.6                                    | 25.5                                      | 12.2             | 2                             | 95             | 577                                   | 292                                   | 131  |
| Minim                  | 4.3                    | 5                                     | 0.3                      | 0.01                     | 0.1                                     | 0.2                                     | 9.9                                     | 19.2                                      | 10.1             | 1                             | 85             | 553                                   | 241                                   | 105  |
| Maxim                  | 4.5                    | 7                                     | 3                        | 0.02                     | 0.5                                     | 0.4                                     | 18.2                                    | 35.8                                      | 13.4             | 5                             | 92             | 603                                   | 342                                   | 157  |
| CV (%)                 | 4                      | 24                                    | 99                       | 74                       | 90                                      | 47                                      | 61                                      | 39                                        | 20               | 93                            | 10             | 6                                     | 25                                    | 28   |
| C. Fert.               | L                      | L                                     | VL                       | VL                       | VL                                      | VL                                      | H                                       | M                                         | L                | VL                            | VL             | -                                     | -                                     | -    |
| Neossols               |                        |                                       |                          |                          |                                         |                                         |                                         |                                           |                  |                               |                |                                       |                                       |      |
| Mean                   | 4.1                    | 9                                     | 5                        | 0.04                     | -                                       | -                                       | 4.9                                     | 26.7                                      | 4.9              | 0.2                           | 99             | 741                                   | 162                                   | 97   |
| Minim                  | 3.9                    | 8                                     | 2                        | 0.01                     | -                                       | -                                       | 4.5                                     | 23.1                                      | 4.5              | 0.1                           | 89             | 691                                   | 113                                   | 96   |
| Maxim                  | 4.4                    | 10                                    | 8                        | 0.05                     | -                                       | -                                       | 7.3                                     | 28.2                                      | 5.3              | 0.3                           | 96             | 791                                   | 212                                   | 98   |
| CV (%)                 | 9                      | 16                                    | 60                       | 17                       | -                                       | -                                       | 32                                      | 8                                         | 11               | 13                            | 20             | 10                                    | 43                                    | 1    |
| C. Fert.               | VL                     | L                                     | L                        | VL                       | -                                       | -                                       | M                                       | M                                         | L                | VL                            | VH             | -                                     | -                                     | -    |
| Gleissols              |                        |                                       |                          |                          |                                         |                                         |                                         |                                           |                  |                               |                |                                       |                                       |      |
| Mean                   | 3.5                    | 12                                    | 12                       | 0.7                      | 45.2                                    | 29.0                                    | 85.4                                    | 148.7                                     | 160.3            | 34                            | 53             | 313                                   | 171                                   | 516  |
| Minim                  | 2.3                    | 10                                    | 0.7                      | 0.2                      | 16.4                                    | 17.9                                    | 7.1                                     | 30.4                                      | 86.0             | 19                            | 5              | 470                                   | 910                                   | 100  |
| Maxim                  | 4.8                    | 24                                    | 29                       | 1.4                      | 115.3                                   | 38.5                                    | 233.4                                   | 338.4                                     | 312.0            | 83                            | 75             | 809                                   | 299                                   | 783  |
| CV (%)                 | 38                     | 79                                    | 106                      | 76                       | 90                                      | 31                                      | 122                                     | 96                                        | 54               | 60                            | 81             | 115                                   | 54                                    | 57   |
| C. Fert.               | VL                     | M                                     | H                        | L                        | VH                                      | VH                                      | M                                       | VH                                        | VH               | M                             | H              | -                                     | -                                     | -    |
| Cambissols             |                        |                                       |                          |                          |                                         |                                         |                                         |                                           |                  |                               |                |                                       |                                       |      |
| Mean                   | 5                      | 7.7                                   | 5.7                      | 0.2                      | 16.4                                    | 2.8                                     | 5.1                                     | 136.0                                     | 24.5             | 13                            | 21             | 489                                   | 345                                   | 166  |
| Minim                  | 4                      | 66                                    | 2.9                      | 0.02                     | 15.6                                    | 2.1                                     | 2.9                                     | 120.8                                     | 20.8             | 12                            | 14             | 439                                   | 296                                   | 166  |
| Maxim                  | 5.0                    | 87                                    | 7.5                      | 0.4                      | 17.2                                    | 3.4                                     | 9.3                                     | 161.2                                     | 25.1             | 11                            | 14             | 539                                   | 396                                   | 175  |
| CV (%)                 | 5                      | 20                                    | 68                       | 38                       | 10                                      | 33                                      | 49                                      | 15                                        | 10               | 5                             | 1              | 15                                    | 20                                    | 1    |
| C. Fert.               | 1                      | VL                                    | M                        | VL                       | M                                       | L                                       | M                                       | VH                                        | VH               | VL                            | L              | -                                     | -                                     | -    |

24 <sup>a</sup>Descriptive statistic, <sup>b</sup>Organic carbon, <sup>c</sup>Cation exchange capacity, <sup>d</sup>Base saturation  $\sum (K, Ca, Mg) / CEC / 100$ ,25 <sup>e</sup>Aluminum saturation (100 x Al<sup>3+</sup>)/CEC, <sup>f</sup>Coefficients of variation, <sup>g</sup>Classes of soil fertility for the complex cation

26 exchange according to Alvarez et al. (1999): VL- Very Low, L - Low, M - Medium, H- High, VH- Very high.

27

28

29

30

31

32 **Table S3**

33 Descriptive statistic of the levels of oxides SiO<sub>2</sub>, Fe<sub>2</sub>O<sub>3</sub>, Al<sub>2</sub>O<sub>3</sub>, Mn<sub>2</sub>O<sub>3</sub> and TiO<sub>2</sub> extracted by alkaline and sulfuric acid  
 34 attack, of the poorly crystallized forms of Mn<sub>2</sub>O<sub>3</sub>, Fe<sub>2</sub>O<sub>3</sub> and free oxides Fe<sub>2</sub>O<sub>3</sub>; and the relationships between them in the  
 35 soil subsurface layer in the state of Pará.

| Statistic <sup>a</sup> | Oxide by sulfuric acid attack |                                |                                |                  |                                | Relationships <sup>b</sup> |     | OXA <sup>c</sup>               |                                | CBD <sup>d</sup>               |                                | Relationships        |                      |
|------------------------|-------------------------------|--------------------------------|--------------------------------|------------------|--------------------------------|----------------------------|-----|--------------------------------|--------------------------------|--------------------------------|--------------------------------|----------------------|----------------------|
|                        | SiO <sub>2</sub>              | Al <sub>2</sub> O <sub>3</sub> | Fe <sub>2</sub> O <sub>3</sub> | TiO <sub>2</sub> | Mn <sub>2</sub> O <sub>3</sub> | Ki                         | Kr  | Mn <sub>2</sub> O <sub>3</sub> | Fe <sub>2</sub> O <sub>3</sub> | Al <sub>2</sub> O <sub>3</sub> | Fe <sub>2</sub> O <sub>3</sub> | Feo/Fed <sup>f</sup> | Fed/Fet <sup>g</sup> |
|                        | .....g kg <sup>-1</sup> ..... |                                |                                |                  |                                |                            |     | .....g kg <sup>-1</sup> .....  |                                |                                |                                |                      |                      |
|                        | Latosols                      |                                |                                |                  |                                |                            |     |                                |                                |                                |                                |                      |                      |
| Mean                   | 133.4                         | 143.3                          | 74.4                           | 97.5             | 2.1                            | 1.5                        | 1.2 | 0.2                            | 2.1                            | 20.5                           | 40.1                           | 0.1                  | 0.6                  |
| Minim                  | 22                            | 43.3                           | 7.4                            | 12.2             | 0.1                            | 0.9                        | 0.5 | 0.01                           | 0.3                            | 4.8                            | 1.4                            | 0.01                 | 0.1                  |
| Maxim                  | 268                           | 313.3                          | 214                            | 393.2            | 6.5                            | 2.2                        | 2.0 | 2.3                            | 6.6                            | 48.2                           | 117.5                          | 0.4                  | 0.9                  |
| CV <sup>g</sup> (%)    | 51                            | 47                             | 90                             | 101              | 106                            | 23                         | 32  | 212                            | 91                             | 51                             | 77                             | 105                  | 35                   |
|                        | Argisols                      |                                |                                |                  |                                |                            |     |                                |                                |                                |                                |                      |                      |
| Mean                   | 117.7                         | 129                            | 37.9                           | 69               | 1.2                            | 1.5                        | 1.3 | 0.1                            | 2.2                            | 25.5                           | 25.3                           | 0.1                  | 0.8                  |
| Minim                  | 45                            | 70.1                           | 14.9                           | 24.2             | 0.1                            | 1.1                        | 0.9 | 0.0                            | 0.3                            | 13.7                           | 12.9                           | 0.02                 | 0.4                  |
| Maxim                  | 207                           | 223.1                          | 123.4                          | 174.5            | 4.4                            | 2.0                        | 1.8 | 0.6                            | 5.0                            | 50                             | 53                             | 0.2                  | 0.9                  |
| CV (%)                 | 49                            | 41                             | 80                             | 57               | 124                            | 16                         | 22  | 145                            | 64                             | 40                             | 50                             | 62                   | 19                   |
|                        | Nitossols                     |                                |                                |                  |                                |                            |     |                                |                                |                                |                                |                      |                      |
| Mean                   | 218.5                         | 213.7                          | 176.1                          | 263.8            | 2.9                            | 1.7                        | 1.1 | 1.6                            | 7.7                            | 20.4                           | 134                            | 0.1                  | 0.8                  |
| Minim                  | 198                           | 191.2                          | 152.3                          | 247              | 0.8                            | 1.7                        | 1.1 | 1.1                            | 4.9                            | 20.1                           | 124.7                          | 0.03                 | 0.7                  |
| Maxim                  | 239                           | 236.1                          | 199.9                          | 280.6            | 5.0                            | 1.8                        | 1.2 | 2.2                            | 10.4                           | 21.1                           | 143.3                          | 0.1                  | 0.8                  |
| CV (%)                 | 13                            | 15                             | 19                             | 9                | 72                             | 2                          | 3   | 49                             | 36                             | 3                              | 7                              | 42                   | 7                    |
|                        | Plintossols                   |                                |                                |                  |                                |                            |     |                                |                                |                                |                                |                      |                      |
| Mean                   | 71.5                          | 81.5                           | 11.7                           | 41.8             | 0.2                            | 1.5                        | 1.4 | 0.1                            | 1.4                            | 21.8                           | 9.7                            | 0.1                  | 0.8                  |
| Minim                  | 70                            | 78                             | 10                             | 39               | 0.02                           | 0.8                        | 0.5 | 0.1                            | 1.1                            | 19.6                           | 9.3                            | 0.1                  | 0.6                  |
| Maxim                  | 73                            | 85                             | 13.4                           | 44.5             | 0.6                            | 2.5                        | 2.2 | 0.1                            | 1.7                            | 24.6                           | 10                             | 0.2                  | 1.2                  |
| CV (%)                 | 3                             | 6                              | 21                             | 9                | 18                             | 3                          | 4   | 34                             | 23                             | 12                             | 4                              | 22                   | 37                   |
|                        | Neossols                      |                                |                                |                  |                                |                            |     |                                |                                |                                |                                |                      |                      |
| Mean                   | 26.5                          | 42.1                           | 6.3                            | 27.5             | 4.8                            | 1.1                        | 1.0 | 0.03                           | 0.1                            | 7.0                            | 4.4                            | 0.02                 | 0.5                  |
| Minim                  | 25                            | 39                             | 5.8                            | 27               | 4.1                            | 0.1                        | 0.6 | 0.01                           | 0.01                           | 6.3                            | 3.9                            | 0.01                 | 0.4                  |
| Maxim                  | 28                            | 45.1                           | 6.7                            | 28               | 5.3                            | 1.8                        | 1.3 | 0.05                           | 0.7                            | 7.5                            | 5.1                            | 0.02                 | 0.6                  |
| CV (%)                 | 8                             | 10                             | 10                             | 3                | 13                             | 2                          | 4   | 7                              | 43                             | 9                              | 14                             | 31                   | 37                   |
|                        | Gleissols                     |                                |                                |                  |                                |                            |     |                                |                                |                                |                                |                      |                      |
| Mean                   | 110.8                         | 71.7                           | 34.1                           | 43.4             | 2.7                            | 2.6                        | 2.0 | 0.5                            | 2.2                            | 20                             | 19                             | 0.1                  | 0.6                  |
| Minim                  | 54                            | 42.5                           | 15.4                           | 31.2             | 0.3                            | 2.2                        | 1.7 | 0.1                            | 0.9                            | 12.1                           | 10                             | 0.1                  | 0.5                  |
| Maxim                  | 177                           | 100.9                          | 50.3                           | 57.1             | 6.7                            | 3.1                        | 2.4 | 1.3                            | 3.4                            | 38.7                           | 28.7                           | 0.2                  | 0.7                  |
| CV (%)                 | 49                            | 43                             | 54                             | 28               | 110                            | 19                         | 17  | 106                            | 49                             | 63                             | 44                             | 3                    | 16                   |
|                        | Cambissols                    |                                |                                |                  |                                |                            |     |                                |                                |                                |                                |                      |                      |
| Mean                   | 65.5                          | 135.1                          | 249.3                          | 159.1            | 0.4                            | 0.8                        | 0.4 | 0.2                            | 2.7                            | 32.6                           | 125.3                          | 0.3                  | 0.5                  |
| Minim                  | 63                            | 130.1                          | 239.5                          | 154              | 0.2                            | 0.3                        | 0.1 | 0.1                            | 1.8                            | 32                             | 117.1                          | 0.03                 | 0.5                  |
| Maxim                  | 68                            | 140                            | 259                            | 164.1            | 0.7                            | 1.1                        | 0.6 | 0.3                            | 4.0                            | 33.1                           | 133.3                          | 0.4                  | 0.8                  |
| CV (%)                 | 5                             | 5                              | 6                              | 5                | 11                             | 0.2                        | 9   | 45                             | 43                             | 2                              | 7                              | 2                    | 7                    |

36 <sup>a</sup>Descriptive statistic, <sup>b</sup>Weathering index, <sup>c</sup>Low. crystallinity forms extracted by ammonium oxalate acid, <sup>d</sup>crystalline Fe

37 extracted by citrate-bicarbonate-dithionite, <sup>e</sup>Relationships between amorphous and crystalline Fe, <sup>f</sup>Relationship between

38 levels of citrate-bicarbonate-dithionite Fe and Fe by sulfuric acid attack <sup>g</sup>Coefficients of variation.

39
